# Supplementary material
Source: PubMed Central journal article supplement (PMC2141679)
Supplement: rspb20063767s10.pdf [file rspb20063767s10.pdf]

Table S1: Sampling localities for *Thaumetopoea* spp. and number of sequenced and genotyped individuals. No COI: number of individuals sequenced for the COI gene; No ITS1: number of individuals sequenced for the ITS1 domain; No microsat: number of individuals genotyped for the 5 microsatellite loci.

| Species                | Country  | Locality                         | Code   | Geographic coordinates                                               | No COI | No ITS1 | No microsat |
|------------------------|----------|----------------------------------|--------|----------------------------------------------------------------------|--------|---------|-------------|
| <i>T. pityocampa</i>   | Portugal | Leiria (Winter)                  | PT-LW  | 39° 50' N; 8° 57' W                                                  | 6      | 2       | 36          |
| <i>T. pityocampa</i>   | Portugal | Leiria (Summer)                  | PT-LS  | 39° 43' N; 8° 59' W                                                  | 5      | 2       | 29          |
| <i>T. pityocampa</i>   | Portugal | Viseu                            | PT-VIS | 40° 40' N; 7° 54' W                                                  | 5      | 2       | 24          |
| <i>T. pityocampa</i>   | Portugal | Alcacer                          | PT-ALC | 38° 23' N; 8° 31' W                                                  | 5      | 2       | 31          |
| <i>T. pityocampa</i>   | Portugal | Apostica                         | PT-APO | 38° 34' N; 9° 08' W                                                  | 6      | 2       | -           |
| <i>T. pityocampa</i>   | Portugal | Vargès                           | PT-VAR | 41° 52' N; 6° 40' W                                                  | 5      | 2       | -           |
| <i>T. pityocampa</i>   | Portugal | Sevivas                          | PT-SEV | 41° 31' N; 7° 30' W                                                  | 5      | 2       | -           |
| <i>T. pityocampa</i>   | Spain    | Boltaña                          | SP-BOL | 42°26' N; 0°02' E                                                    | 6      | -       | -           |
| <i>T. pityocampa</i>   | Spain    | Granada                          | SP-GRA | 37° 47' N; 3° 46' W                                                  | 6      | 2       | 23          |
| <i>T. pityocampa</i>   | Spain    | Guadarrama                       | SP-GUA | 40°41' N; 4°02' W                                                    | 5      | 2       | 24          |
| <i>T. pityocampa</i>   | France   | Bordeaux                         | FR-BOR | 44°44' N; 0°46' W                                                    | 6      | 2       | -           |
| <i>T. pityocampa</i>   | France   | Toulon                           | FR-TOU | 43°03' N; 5°51' E                                                    | 5      | 2       | -           |
| <i>T. wilkinsoni</i>   | Cyprus   | Limassol<br>Evrychou<br>Platania | ThWil  | 34° 40' N; 33° 02' E<br>34° 55' N; 32° 53' E<br>35° 00' N; 32° 40' E | 4      | 2       | -           |
| <i>T. pinivora</i>     | Sweden   | Gotland Island                   | ThPin  | 57°30' N; 18°30' E                                                   | 5      | 2       | -           |
| <i>T. solitaria</i>    | Lebannon | Smar jbeil                       | ThSol  | 34°13' N; 35°04' E                                                   | 5      | 2       | -           |
| <i>T. processionea</i> | France   | Nancy                            | ThPro  | 48°35' N; 6°25' E                                                    | -      | 2       | -           |
