# Supplementary material
Source: PubMed Central journal article supplement (PMC2141679)

Figure S1: Histograms of allelic frequencies per population for the 5 microsatellite loci used. Allelic sizes were determined using the GeneScan software with the 400HD-ROX (Applied Biosystems) as size standard as described in Rousselet *et al.* (2004). Locus *MS-Thpit6* was fluorescently-labelled with 6-Fam (Sigma) and sized with the size standard 500-LIZ (Applied Biosystems). The alleles found in the summer population are represented in colour.

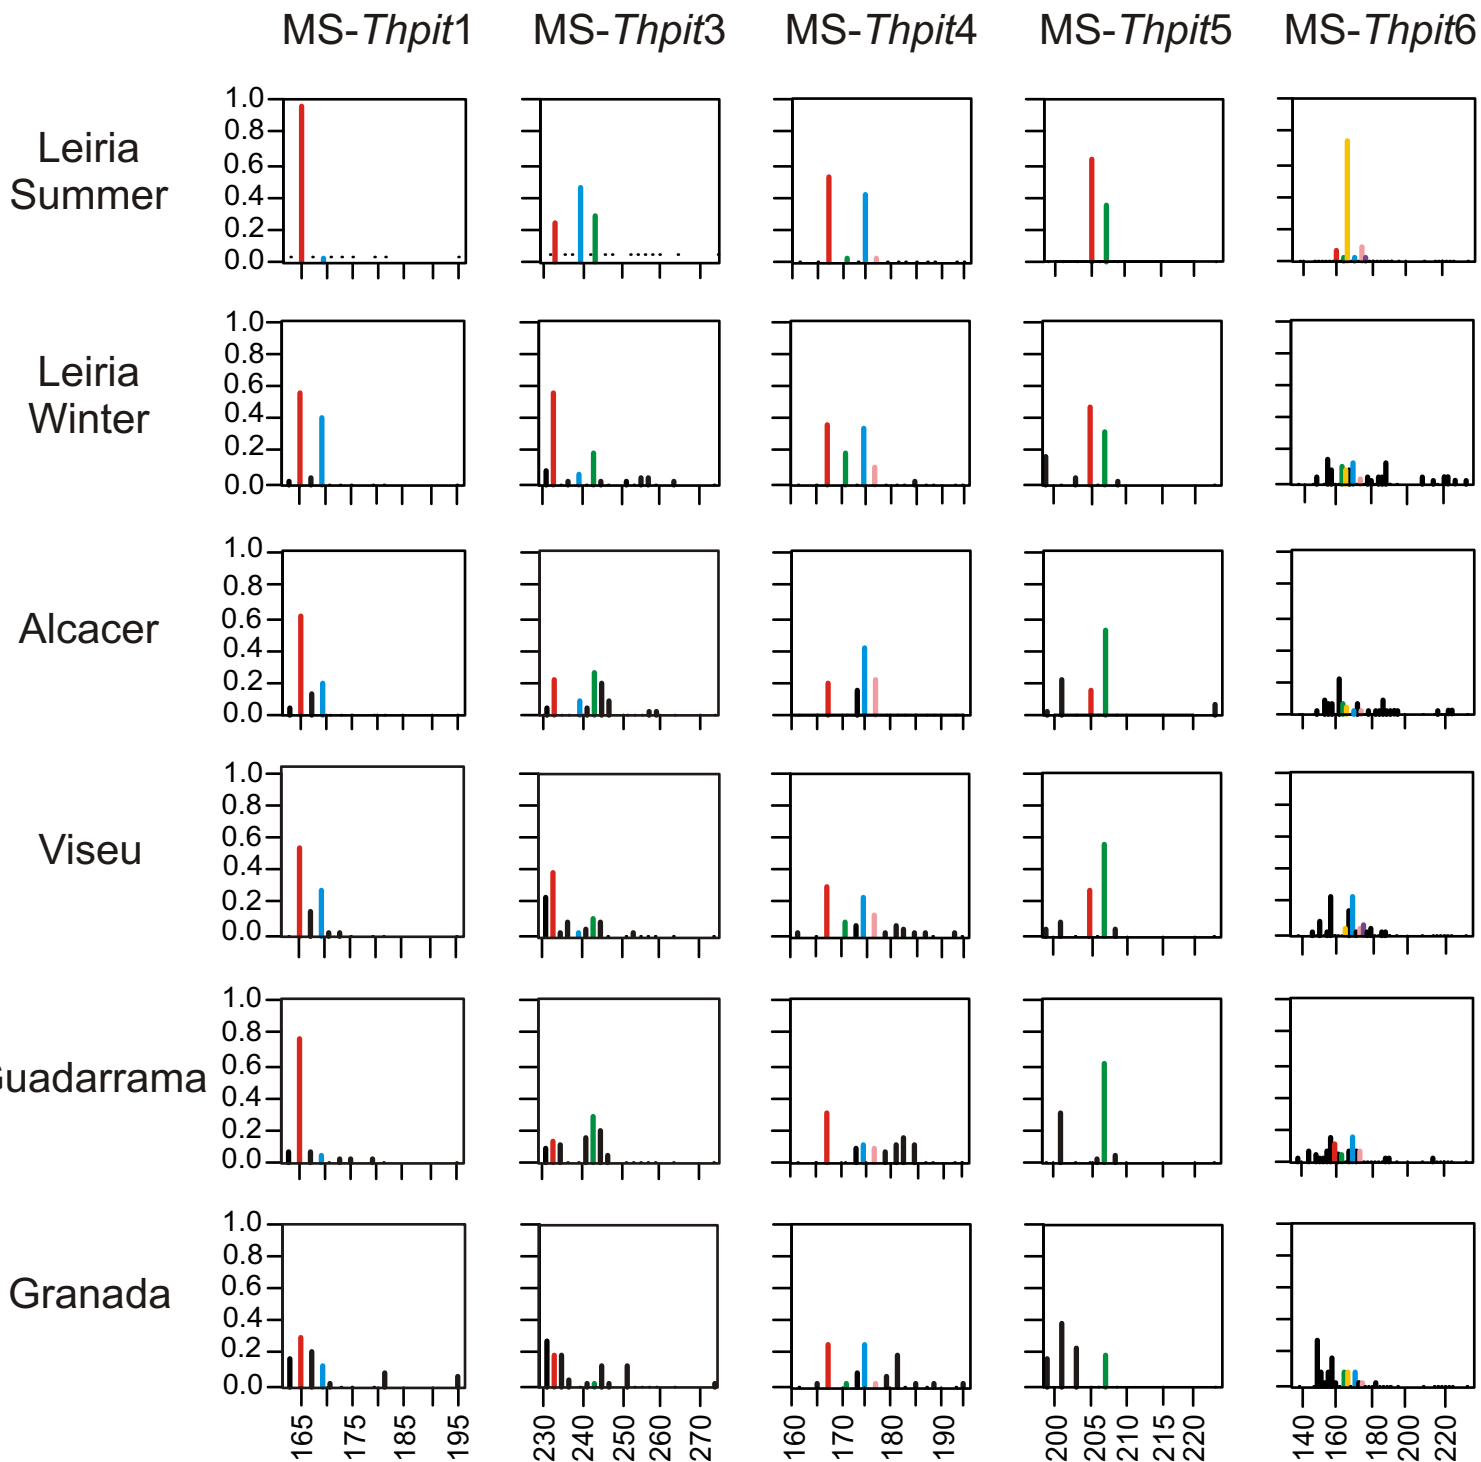

Supplement: rspb20063767s11.pdf [file rspb20063767s11.pdf]
